# Supplementary material for: Fast sequence-based microsatellite genotyping development workflow
Source: bioRxiv preprint, doi:10.1101/649772, version 2 (2019-12-16)
Supplement: Supporting Material Figure S1 [file 649772_file02.docx]

Supporting Figure S1 : Effect of sequence coverage (usuing one, two or three Illumina Miseq nano flowcells) on SSRseq data quality for *Alosa* species.
